# Supplementary material for: Direct electrochemistry and bioelectrocatalysis of horseradish peroxidase entrapped in a self-supporting nanoporous gold electrode: a new strategy to improve the orientation of immobilized enzymes
Source: Royal Society of Chemistry journal article supplement (doi:10.1039/c5ay01333j), 2015-01-01
Supplement: c5ay01333j1.pdf [file c5ay01333j1.pdf]

## Supporting information

**Direct electrochemistry and bioelectrocatalysis of horseradish peroxidase  
entrapped in a self-supporting nanoporous gold electrode:  
a new strategy to improve the orientation of immobilized enzyme**

Lu Lu,<sup>\*ab</sup> Yanjie Dong,<sup>a</sup> Junwei Wang,<sup>a</sup> Qianqian Li<sup>a</sup> and Xia Wu<sup>\*a</sup>

*<sup>a</sup>School of Chemistry and Chemical Engineering, Anqing Normal University,*

*Anqing 246011, P. R. China*

*<sup>b</sup>Collaborative Innovation Center for Petrochemical New Materials,*

*Anqing 246011, P. R. China*

\*Corresponding author: Lu Lu and Xia Wu

Address: No. 128 Linghu Nanlu

Anqing Normal University

School of Chemistry and Chemical Engineering

Anqing 246011, China

Tel.: +86-556-550-0090; Fax: +86-556-550-0090

E-mail address: lulu19861117@126.com; xiawu@aqtc.edu.cn

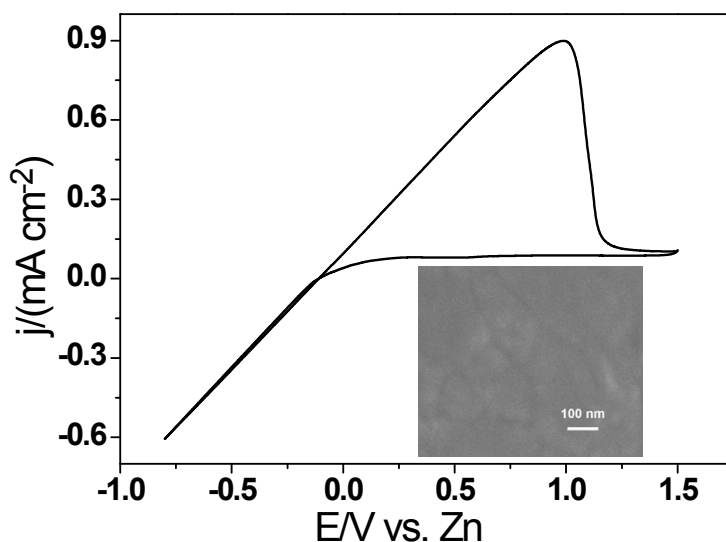

**Fig. S1.** The CV gram of a polished gold wire in [Choline]Cl·2ZnCl<sub>2</sub> at 40 °C. Scan rate: 0.01 V s<sup>-1</sup>. Inset: the SEM image of the gold wire surface after the electrochemical treatment.

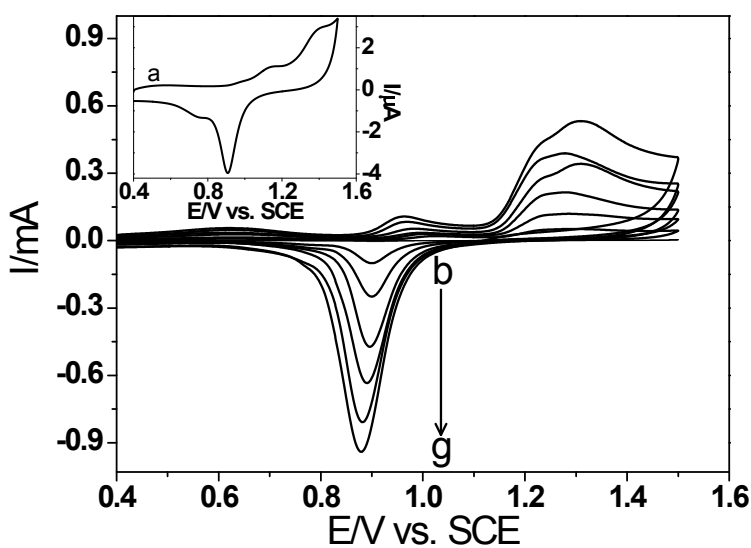

**Fig. S2.** CV grams of a polished gold electrode (a) and NPGEs (b-g) in 0.5 M H<sub>2</sub>SO<sub>4</sub> solution at a scan rate of 0.1 V s<sup>-1</sup>. Inset: the magnified curve of curve a. The NPGEs were obtained from the gold electrode after alloying/dealloying at 50 °C (b), 70 °C (c), 90 °C (d), 100 °C (e), 110 °C (f) and 120 °C (g) at a scan rate of 0.01 V s<sup>-1</sup> after 15 cycles.

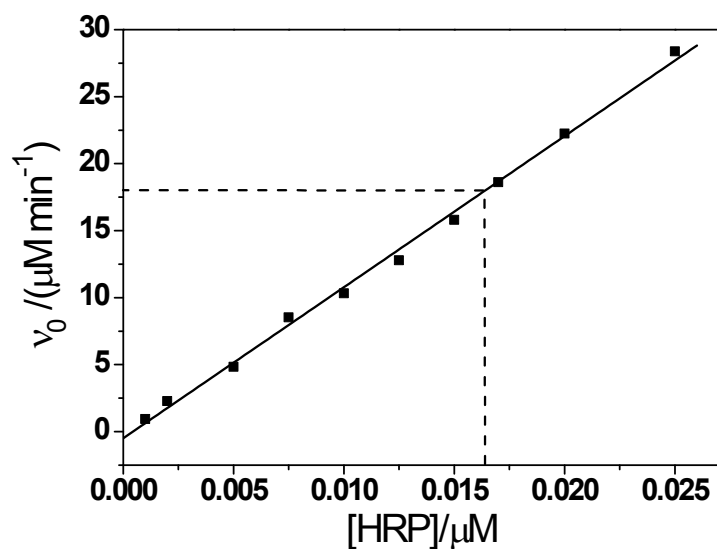

**Fig. S3.** Calibration curve of the initial rate of catalytic oxidation of OPD by HRP versus the concentration of HRP in 0.1 M phosphate buffer (pH 7.0). Each datum was an average of three replicate determinations.

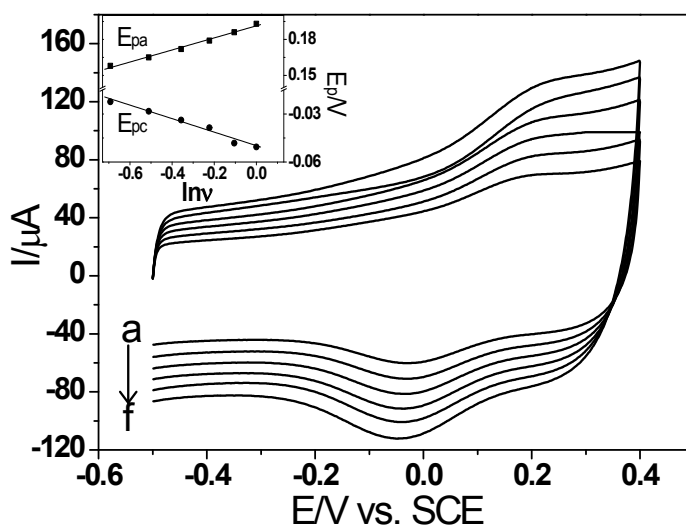

**Fig. S4.** CV grams of Nafion/HRP/NPGE in 0.1 M phosphate buffer (pH 7.0) at different scan rates (a-f: 0.5, 0.6, 0.7, 0.8, 0.9 and 1.0 V s<sup>-1</sup>). Inset: plot of redox peak potential versus lnv.

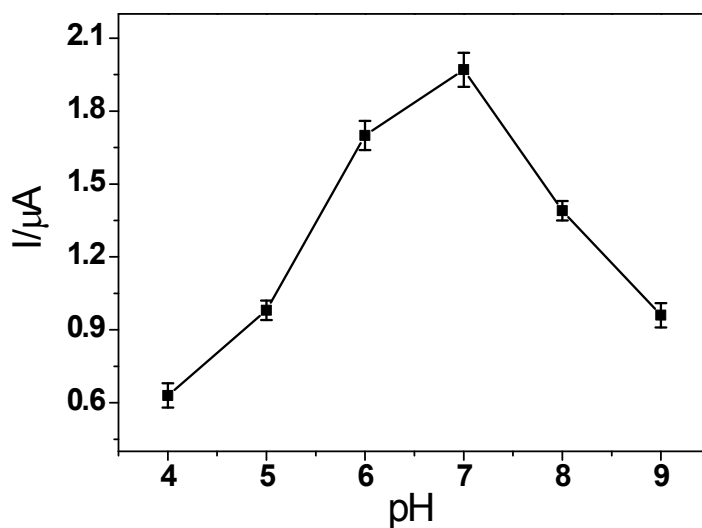

**Fig. S5.** The effect of the buffer pH on the electrochemical response current of 0.1 mM H<sub>2</sub>O<sub>2</sub> on Nafion/HRP/NPGE.

**Table S1.** The real area ( $A_{real}$ ) and  $R_f$  of the NPGEs fabricated under different temperatures.<sup>a, b</sup>

| Temperature/°C | $A_{real}/\text{mm}^2$ | $R_f$ |
|----------------|------------------------|-------|
| 50             | 11                     | 6.2   |
| 70             | 27                     | 15.3  |
| 90             | 58                     | 32.8  |
| 100            | 76                     | 42.9  |
| 110            | 104                    | 58.8  |
| 120            | 156                    | 88.1  |

<sup>a</sup> NPGEs fabricated after 15 scan cycles at a scan rate of 0.01 V s<sup>-1</sup>.

<sup>b</sup> Each datum was an average of three replicate determinations.

**Table S2.** Comparison of analytical performance of several HRP biosensors for H<sub>2</sub>O<sub>2</sub>.

| HRP biosensors                                                                    | Linear range/ $\mu\text{M}$ | Sensitivity/ $\mu\text{A mM}^{-1}$ | Detection limit/ $\mu\text{M}$ | References |
|-----------------------------------------------------------------------------------|-----------------------------|------------------------------------|--------------------------------|------------|
| Nafion/HRP-GNS <sup>a</sup> -TiO <sub>2</sub> /GCE <sup>b</sup>                   | 41-630                      | 0.23                               | 5.9                            | 1          |
| Ti/TiO <sub>2</sub> /Au/HRP                                                       | 5-400                       | Not reported                       | 2                              | 2          |
| MWNTs <sup>c</sup> /chitosan/GCE                                                  | 16.7-740                    | 4.9                                | 10.3                           | 3          |
| HRP/HNT <sup>d</sup> /chitosan/GCE                                                | 2.6-75                      | 12                                 | 0.7                            | 4          |
| SPCE <sup>e</sup> /GS <sup>f</sup> -Nafion/Fe <sub>3</sub> O <sub>4</sub> -Au-HRP | 20-2500                     | Not reported                       | 12                             | 5          |
| Nafion/HRP/NPGE                                                                   | 10-380                      | 21                                 | 2.6                            | This work  |

<sup>a</sup> Gold nano-seeds.

<sup>b</sup> Glassy carbon electrode.

<sup>c</sup> Multi-wall carbon nanotubes.

<sup>d</sup> Halloysitenanotubes.

<sup>e</sup> Screen-printed carbon electrode.

<sup>f</sup> Graphene sheets.

## References

1. Y. Wang, X. Ma, Y. Wen, Y. Xing, Z. Zhang and H. Yang, *Biosens. Bioelectron.*, 2010, **25**, 2442-2446.
2. A. K. M. Kafi, G. Wu and A. Chen, *Biosens. Bioelectron.*, 2008, **24**, 566-571.
3. L. Qian and X. Yang, *Talanta*, 2006, **68**, 721-727.
4. X. Sun, Y. Zhang, H. Shen and N. Jia, *Electrochim. Acta*, 2010, **56**, 700-705.
5. X. Yang, F. Xiao, H. Lin, F. Wu, D. Chen and Z. Wu, *Electrochim. Acta*, 2013, **109**, 750-755.

**Table S3.** Determination of H<sub>2</sub>O<sub>2</sub> in real samples (diluted disinfectant).\*

| Real sample | Value found in diluted sample/mM | Added/mM | Total found/mM | Recovery/% |
|-------------|----------------------------------|----------|----------------|------------|
| 1           | 0.168                            | 0.050    | 0.214          | 98.2       |
| 2           | 0.168                            | 0.100    | 0.273          | 101.9      |
| 3           | 0.168                            | 0.150    | 0.328          | 103.1      |

\* Each datum was an average of three replicate determinations.
